# Supplementary material for: Urinary interleukin-6 as a predictor of radiographic progression in rheumatoid arthritis: A 3-year evaluation
Source: PubMed Central journal article supplement (PMC5059680; doi:10.1038/srep35242), 2016-10-12

## Supplementary Information

### **Urinary interleukin-6 as a predictor of radiographic progression in rheumatoid arthritis: A 3-year evaluation**

Yune-Jung Park<sup>1,2</sup>, Seung-Ah Yoo<sup>2</sup>, Ga-Ram Kim<sup>2</sup>, Chul-Soo Cho<sup>2,3</sup>, Wan-Uk Kim<sup>2,4</sup>

<sup>1</sup>Department of Internal Medicine, Division of Rheumatology, St. Vincent's Hospital, College of Medicine, The Catholic University of Korea, Suwon, Korea; <sup>2</sup>Center for Integrative Rheumatoid Transcriptomics and Dynamics, The Catholic University of Korea, Seoul, Korea; <sup>3</sup>Department of Internal Medicine, Division of Rheumatology, Yeouido St. Mary's Hospital, College of Medicine, The Catholic University of Korea, Seoul, Korea; <sup>4</sup>Department of Internal Medicine, Division of Rheumatology, Seoul St. Mary's Hospital, College of Medicine, The Catholic University of Korea, Seoul, Korea.

**Supplementary Table 1. Increase in the risk of radiographic progression at 3 years by combination of urinary IL-6, IL-8, and CCL2 tertiles**

| Categories based on urinary proteins*     | Odds ratio <sup>†</sup><br>(95% confidence interval) |
|-------------------------------------------|------------------------------------------------------|
| Categories based on IL-6 and IL-8 levels* |                                                      |
| Both low (n=27)                           | 1                                                    |
| Both mid (n=64)                           | 1.9 (0.6-4.7)                                        |
| High IL-6 (n=32)                          | 2.7 (0.9-8.1)                                        |
| High IL-8 (n=26)                          | 3.5 (0.7-11.2)                                       |
| Both high (n=24)                          | 3.1 (0.9-9.2)                                        |
| Categories based on IL-6 and CCL2 levels* |                                                      |
| Both low (n=23)                           | 1                                                    |
| Both mid (n=59)                           | 2.9 (0.7-11.9)                                       |
| High IL-6 (n=31)                          | 3.3 (0.8-13.1)                                       |
| High CCL2 (n=34)                          | 1.4 (0.1-2.3)                                        |
| Both high (n=26)                          | 6.2 (1.4-26.4)                                       |
| Categories based on IL-8 and CCL2 levels* |                                                      |
| Both low (n=25)                           | 1                                                    |
| Both mid (n=56)                           | 2.9 (0.9-14.3)                                       |
| High IL-8 (n=34)                          | 2.4 (0.2-24.5)                                       |
| High CCL2 (n=33)                          | 5.0 (0.6-41.4)                                       |
| Both high (n=25)                          | 6.1 (1.8-37.9)                                       |

\* Both low (reference): IL-6 level below the first tertile (< 29.9), IL-8 level below the first tertile (< 10.4), and CCL2 level below the first tertile (85.1); both mid: mid-range values of IL-6, IL-8 or CCL2, but neither high; high IL-6: high IL-6 level only (IL-6 > 116.9); high IL-8: high IL-8 level only (IL-8 > 92.0); high CCL2: high CCL2 level only (CCL2 > 195); both high: both IL-6 and IL-8 levels in the highest tertile (IL-6 ≥116.9 and IL-8 ≥ 92.0 ); both IL-6 and CCL2 levels in the highest tertile (IL-6 ≥116.9 and CCL2 ≥195); both IL-8 and CCL2 levels in the highest tertile (IL-8 ≥92.0 and CCL2 ≥195). IL-6, IL-8, and CCL2 levels were adjusted for urine creatinine and expressed as units [(ng/mL)/(mg/dL)]X1000.

† Adjusted for age, sex, smoking status, disease duration, disease activity scores in 28 joints, use of methotrexate, and use of anti-tumor necrosis factor therapy.

### Supplementary Figure Legend

**Supplementary Figure 1. Relationship between urine IL-6 level and proteinuria, ESR, and serum CRP for predicting radiographic progression of RA at 3 years.** **A.** (Left) Comparison of proteinuria levels between radiographic progression and non-progression groups at 1 year. (Right) Urinary IL-6 levels between radiographic progression and non-progression groups at 1 year according to the extent of proteinuria (tertiles 1, 2, and 3). **B.** (Left) Comparison of proteinuria levels between radiographic progression and non-progression group at 3 years. (Right) Urinary IL-6 levels between radiographic progression and non-progression groups at 3 years according to the extent of proteinuria (tertiles 1, 2, and 3). **C and D.** Predicted probability plot of high urinary IL-6 ( $\geq 1.17$  ng/ml: upper tertile of urinary IL-6) for radiographic progression in association with serum CRP (**C**) and ESR levels (**D**) in patients with RA (red circles indicate the upper tertile of ESR or CRP:  $\text{ESR} \geq 45$  mm/hour and  $\text{CRP} \geq 1.34$  mg/dl, black circles indicate the lower tertile of ESR or CRP:  $\text{ESR} < 45$  mm/hour and  $\text{CRP} < 1.34$  mg/dl). \* $P < 0.05$  and \*\* $P < 0.01$ .

A.

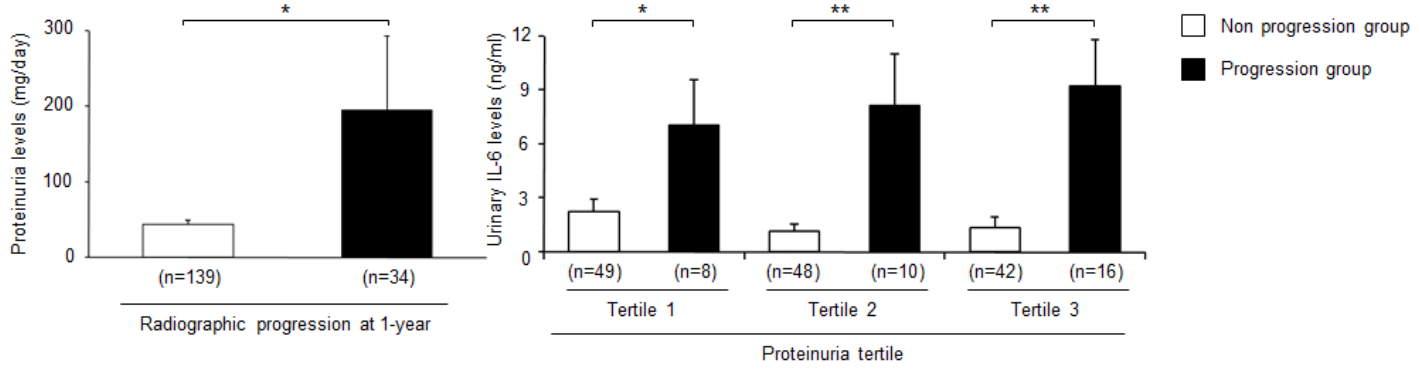

B.

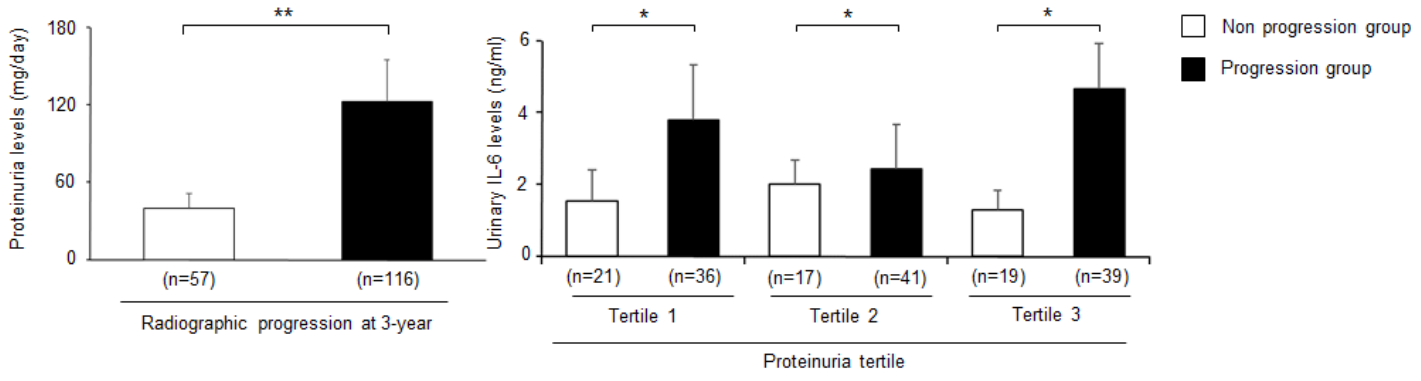

C.

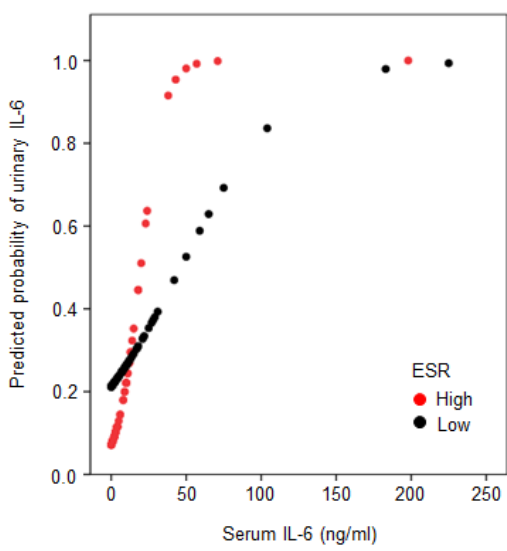

D.

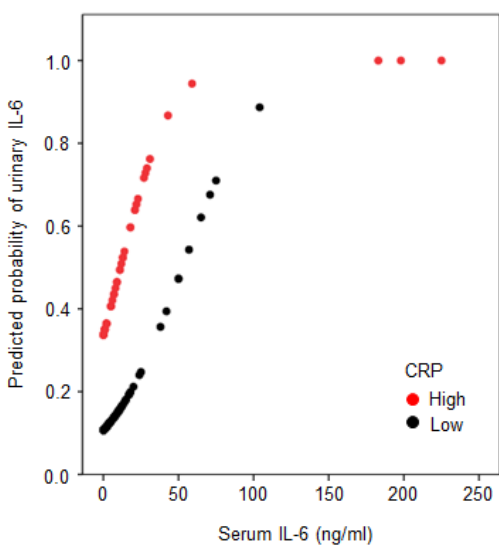

Supplement: srep35242-s1.pdf [file srep35242-s1.pdf]
